# Supplementary material
Source: PubMed Central journal article supplement (PMC5561903)
Supplement: blood781450-suppl1.pdf [file blood781450-suppl1.pdf]

**Supplemental Table 1. Summary of killing of meningococci from strains H44/76 and 4243 by blood from individual immunized donors**

| Subject ID | <b>CFU/mL at 3hr</b>              |                     |                                 |                     |
|------------|-----------------------------------|---------------------|---------------------------------|---------------------|
|            | <b>Serogroup B, Strain H44/76</b> |                     | <b>Serogroup C, Strain 4243</b> |                     |
|            | <b>4 µM ACH-4471</b>              | <b>50 µg/mL EZU</b> | <b>4 µM ACH-4471</b>            | <b>50 µg/mL EZU</b> |
| 1          | <100                              | 131000              | <100                            | 60500               |
| 2          | <100                              | 65000               | <100                            | 112000              |
| 3          | 17800                             | 92000               | <100                            | 79000               |
| 4          | <100                              | 231000              | <100                            | 237000              |
| 5          | 4800                              | 126000              | <100                            | 98000               |
| 6          | 2900                              | 45000               | <100                            | 105000              |
| 7          | 640                               | 96000               | 5300                            | 103000              |
| 8          | 14000                             | 54000               | 25000                           | 399000              |
| 9          | <100                              | 48000               | <100                            | 65000               |
| 10         | <100                              | 95000               | <100                            | 55500               |
| 11         | <100                              | 235000              | <100                            | 94500               |
| 12         | <100                              | 64100               | <100                            | 235000              |

|  |                                       |
|--|---------------------------------------|
|  | <100 CFU/ml (sterile culture)         |
|  | No increase in CFU/ml above control   |
|  | <10 fold increase above control       |
|  | 10 to 100 fold increase above control |

An average of 3561 CFU/ml of serogroup B strain H44/76 and 4903 CFU of serogroup C strain 4243 were added to blood at time 0. In the absence of inhibitor, all subjects had sterile cultures (<100 CFU/ml) after incubation of blood for 3 hrs. All subjects had been immunized with a meningococcal polysaccharide or conjugate vaccine that included serogroup C, and a meningococcal serogroup B vaccine (MenB-FHbp, subjects 1-6; or MenB-4C, subjects 7 to 12).

**Supplemental Table 2. Summary of killing of meningococci from Ohio University and Quebec strains by blood from individual donors immunized with MenB-4C**

|                   | <b>CFU/mL at 3hr</b>     |                     |                      |                     |
|-------------------|--------------------------|---------------------|----------------------|---------------------|
|                   | <b>Ohio Univ. Strain</b> |                     | <b>Quebec Strain</b> |                     |
| <b>Subject ID</b> | <b>4 µM ACH-4471</b>     | <b>50 µg/mL EZU</b> | <b>4 µM ACH-4471</b> | <b>50 µg/mL EZU</b> |
| 7                 | <100                     | 62000               | <100                 | 15000               |
| 8                 | 4700                     | 85000               | <100                 | 23000               |
| 9                 | <100                     | 34000               | <100                 | 14500               |
| 10                | 2000                     | 76000               | <100                 | 26500               |
| 11                | 1420                     | 74000               | <100                 | 35828               |

|  |                                       |
|--|---------------------------------------|
|  | <100 CFU/ml (sterile culture)         |
|  | No increase in CFU/ml above control   |
|  | <10 fold increase above control       |
|  | 10 to 100 fold increase above control |

An average of 3084 CFU/ml of serogroup B Ohio University strain and 2737 CFU/ml of the Quebec strain were added to blood at time 0. In the absence of inhibitor, all subjects had sterile cultures (<100 CFU/ml) after incubation of blood for 3 hrs. All subjects had been immunized with meningococcal serogroup B vaccine (MenB-4C).

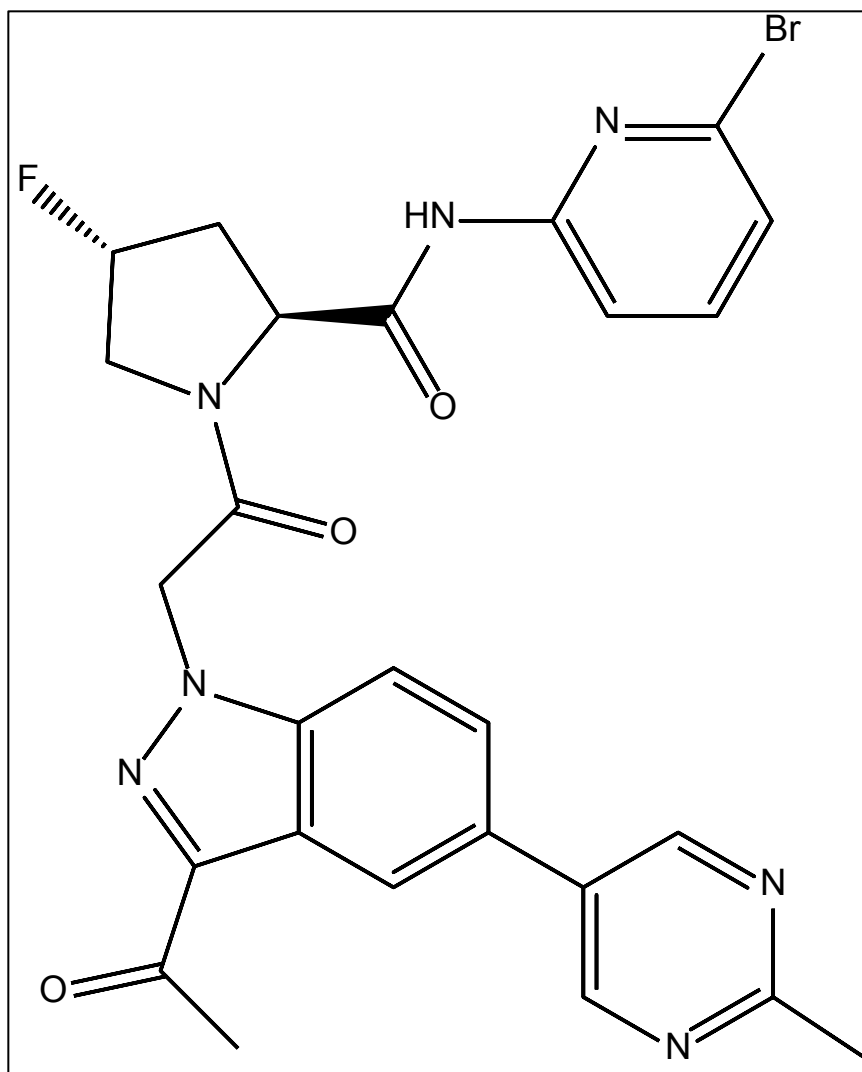

**Supplemental Figure S1.** Structure of ACH-4471. We acknowledge Drs. Jason Wiles, Avinash Phadke and Venkat Gadachanda of Achillion Pharmaceuticals for providing ACH-4471 (1).

### Reference

1. Yuan X, Gavriilaki E, Thanassi JA, et al. Small-molecule factor D inhibitors selectively block the alternative pathway of complement in paroxysmal nocturnal hemoglobinuria and atypical hemolytic uremic syndrome. *Haematologica*. 2017;102(3):466-475.
